# Supplementary material for: Acute Intermittent Porphyria: An Overview of Therapy Developments and Future Perspectives Focusing on Stabilisation of HMBS and Proteostasis Regulators
Source: MDPI journal article supplement (doi:10.3390/ijms22020675), 2021-01-12
Supplement: s1 [file s1]

**Supplemental Table S1.** Summary of missense mutations with classification, outcome and the conclusion from original research article. For consistency, the localisation was mapped to human HMBS<sup>1</sup> for each entry. Variants highlighted in grey are predicted to have no pathogenicity.

| Amino acid change | Classification   |                       |      | Outcome                                             |                                  |                                                               | Original conclusion                                                                                  |       |
|-------------------|------------------|-----------------------|------|-----------------------------------------------------|----------------------------------|---------------------------------------------------------------|------------------------------------------------------------------------------------------------------|-------|
|                   | Catalytic effect | Unstable conformation | Both | Prokaryotic expression (% WT <sup>2</sup> activity) | Other experimental approaches    | Localisation (on the human HMBS <sup>1</sup> )                |                                                                                                      |       |
| p.Met1Ile         | X                |                       |      | 0%                                                  | TS <sup>3</sup>                  | Domain 1, loop, surface                                       | —                                                                                                    | [12]  |
| p.Gly24Ser        | X                |                       |      | 7%                                                  | WB <sup>4</sup>                  | Domain 1, $\beta$ sheet, buried                               | —                                                                                                    | [13]  |
| p.Arg26Cys        | X                |                       |      | —                                                   | <i>In silico</i> <sup>5</sup>    | Domain 1, $\beta$ sheet, active site                          | Altered interaction with DPM                                                                         | [144] |
| p.Arg26Cys        | X                |                       |      | —                                                   | <i>In silico</i>                 | Domain 1, $\beta$ sheet, active site                          | Altered interaction with reaction intermediate and DPM but away from the active site on 3D structure | [8]   |
| p.Arg26Cys        | X                |                       |      | 0.3%                                                | TS / <i>In silico</i> / SDS-PAGE | Domain 1, $\beta$ sheet, active site                          | Altered interaction with DPM                                                                         | [135] |
| p.Arg26Cys        | X                |                       |      | 0.3%                                                | <i>In silico</i>                 | Domain 1, $\beta$ sheet, active site                          | No cofactor assembly                                                                                 | [62]  |
| p.Arg26Cys        | X                |                       |      | 5%                                                  | WB                               | Domain 1, $\beta$ sheet, active site                          | —                                                                                                    | [13]  |
| p.Arg26His        | X                |                       |      | 0.3%                                                | <i>In silico</i>                 | Domain 1, $\beta$ sheet, active site                          | No cofactor assembly                                                                                 | [62]  |
| p.Arg26His        | X                |                       |      | 0.2%                                                | TS / <i>In silico</i> / SDS-PAGE | Domain 1, $\beta$ sheet, active site                          | Altered interaction with DPM                                                                         | [135] |
| p.Arg26His        | X                |                       |      | 3%                                                  | WB                               | Domain 1, $\beta$ sheet, active site                          | No pyrrole chain elongation                                                                          | [13]  |
| p.Ser28Asn        | X                |                       |      | 0.8%                                                | <i>In silico</i>                 | Domain 1, loop, surface                                       | —                                                                                                    | [62]  |
| p.Ser28Asn        | X                |                       |      | 4%                                                  | WB                               | Domain 1, loop, surface                                       | —                                                                                                    | [13]  |
| p.Leu30Pro        | X                |                       |      | 0.2%                                                | TS / WB / <i>In silico</i>       | Domain 1, $\alpha$ helix, surface, at the edge of active site | —                                                                                                    | [139] |
| p.Leu30Phe        | X                |                       |      | 3%                                                  | WB                               | Domain 1, $\alpha$ helix, surface, at the edge of active site | —                                                                                                    | [13]  |
| p.Ala31Thr        | X                |                       |      | Data not shown                                      | —                                | Domain 1, $\alpha$ helix, buried                              | —                                                                                                    | [143] |
| p.Ala31Pro        | X                |                       |      | 0.6%                                                | <i>In silico</i>                 | Domain 1, $\alpha$ helix, buried                              | Altered elongation mechanism                                                                         | [62]  |
| p.Arg32Pro        | X                |                       |      | <1%                                                 | TS / <i>In silico</i>            | Domain 1, $\alpha$ helix, surface, at the edge of active site | Distortion of active site                                                                            | [136] |
| p.Gln34Arg        | X                |                       |      | 0.7%                                                | <i>In silico</i>                 | Domain 1, $\alpha$ helix, active site                         | No pyrrole chain elongation                                                                          | [62]  |
| p.Gln34Lys        |                  | X                     |      |                                                     | <i>In silico</i>                 | Domain 1, $\alpha$ helix, active site                         | Secondary structure alteration                                                                       | [145] |
| p.Gln34Lys        | X                |                       |      | 0.2%                                                | <i>In silico</i>                 | Domain 1, $\alpha$ helix, active site                         | No pyrrole chain elongation                                                                          | [62]  |
| p.Gln34Pro        | X                |                       |      | 1.3%                                                | <i>In silico</i>                 | Domain 1, $\alpha$ helix, active site                         | Secondary structure alteration                                                                       | [140] |
| p.Thr35Met        | X                |                       |      | 3.8%                                                |                                  | Domain 1, $\alpha$ helix, buried                              |                                                                                                      | [141] |

|             |   |                     |                               |                                     |                                                                                                         |                                |       |
|-------------|---|---------------------|-------------------------------|-------------------------------------|---------------------------------------------------------------------------------------------------------|--------------------------------|-------|
| p.Thr35Met  |   | —                   | <i>In silico</i>              | Domain 1, $\alpha$ helix, buried    | Far from active site and no interaction with reaction intermediate and DPM                              | [8]                            |       |
| p.Thr35Met  | X | 11%                 | WB                            | Domain 1, $\alpha$ helix, buried    | —                                                                                                       | [13]                           |       |
| p.Thr59Ile  |   | 77%;<br>(TS 51±16%) | TS                            | Domain 1, $\alpha$ helix, surface   | No defect in enzyme kinetic or stability;<br>Predicted pathogenicity: Benign                            | [12]                           |       |
| p.Thr59Ile  | X | 81%;<br>(TS 10%)    | TS / <i>In silico</i>         | Domain 1, $\alpha$ helix, surface   | —                                                                                                       | [136]                          |       |
| p.Phe77Leu  | X | 0.1%                | TS / WB /<br><i>In silico</i> | Domain 1, active site loop, surface | —                                                                                                       | [139]                          |       |
| p.Thr78Pro  |   | X                   | 2.5%                          | <i>In silico</i>                    | Domain 1, $\alpha$ helix, surface                                                                       | —                              | [148] |
| p.Glu80Gly  |   | X                   | 2.4%                          | <i>In silico</i>                    | Domain 1, $\alpha$ helix, surface                                                                       | —                              | [148] |
| p.Glu86Val  |   | 94%;<br>(TS 45±15%) | TS                            | Domain 1, $\alpha$ helix, surface   | No defect in enzyme kinetic or stability;<br>Predicted pathogenicity: Benign                            | [12]                           |       |
| p.Glu86Val  |   | 93%                 | WB                            | Domain 1, $\alpha$ helix, surface   | —                                                                                                       | [13]                           |       |
| p.Val93Phe  |   | X                   | 1.1%                          | TS / <i>In silico</i>               | Domain 1, $\beta$ sheet, buried                                                                         | Secondary structure alteration | [134] |
| p.Ser96Phe  | X | 1.0%                | <i>In silico</i>              | Domain 1, loop, active site         | No pyrrole chain elongation                                                                             | [62]                           |       |
| p.Ser96Phe  | X | 3%                  | WB                            | Domain 1, loop, active site         | —                                                                                                       | [13]                           |       |
| p.Lys98Asn  | X | <1%                 | —                             | Domain 1, loop, active site         | Altered interaction with DPM                                                                            | [146]                          |       |
| p.Lys98Arg  | X | 0.7%                | <i>In silico</i>              | Domain 1, loop, active site         | No cofactor assembly                                                                                    | [62]                           |       |
| p.Asp99Asn  | X | —                   | <i>In silico</i>              | Domain 1, loop, active site         | Altered interaction with reaction intermediate and DPM<br>but away from the active site on 3D structure | [8]                            |       |
| p.Asp99Gly  | X | 3.2%                | <i>In silico</i>              | Domain 1, loop, active site         | No cofactor assembly                                                                                    | [62]                           |       |
| p.Asp99His  | X | 3.3%                | <i>In silico</i>              | Domain 1, loop, active site         | No cofactor assembly                                                                                    | [62]                           |       |
| p.Gly111Arg |   | —                   | <i>In silico</i>              | Domain 1, $\beta$ sheet, buried     | Far from active site and no interaction with reaction intermediate and DPM                              | [8]                            |       |
| p.Gly111Arg | X | 4%                  | WB                            | Domain 1, $\beta$ sheet, buried     | —                                                                                                       | [13]                           |       |
| p.Ala112Pro |   | X                   | 0.1%                          | TS / WB /<br><i>In silico</i>       | Domain 1, $\beta$ sheet, buried                                                                         | —                              | [139] |
| p.Arg116Trp |   | X                   | 1.4%                          | TS / <i>In silico</i>               | Loop between domain 1 and 2,<br>side chain buried                                                       | —                              | [134] |
| p.Arg116Trp |   | X                   | —                             | <i>In silico</i>                    | Loop between domain 1 and 2,<br>side chain buried                                                       | Altered interaction with DPM   | [149] |

|             |   |   |      |                                  |                                                        |                                                                     |       |
|-------------|---|---|------|----------------------------------|--------------------------------------------------------|---------------------------------------------------------------------|-------|
| p.Arg116Trp |   | X | 0.5% | TS / <i>In silico</i> / SDS-PAGE | Loop between domain 1 and 2, side chain buried         | Strong conformational defect and incapacity of association with DPM | [37]  |
| p.Arg116Trp |   | X | —    | <i>In silico</i>                 | Loop between domain 1 and 2, side chain buried         | Strong conformational defect and incapacity of association with DPM | [8]   |
| p.Arg116Trp | X |   | 4%   | WB                               | Loop between domain 1 and 2, side chain buried         | —                                                                   | [13]  |
| p.Ala122Asp |   | X | 0.2% | TS / WB / <i>In silico</i>       | Domain 2, $\beta$ sheet, buried                        | —                                                                   | [139] |
| p.Ala122Asp |   | X | —    | <i>In silico</i>                 | Domain 2, $\beta$ sheet, buried                        | Altered interaction with reaction intermediate and DPM              | [8]   |
| p.Val124Asp | X |   | 4%   | WB                               | Domain 2, $\beta$ sheet, buried                        | —                                                                   | [13]  |
| p.Lys132Asn |   |   | 97%  | TS / <i>In silico</i> / SDS-PAGE | Domain 2, loop, surface                                | No defect in enzyme kinetic, conformation or stability              | [37]  |
| p.Thr145Ile | X |   | 0.4% | TS / WB / <i>In silico</i>       | Domain 2, $\beta$ sheet, partially buried, active site | —                                                                   | [139] |
| p.Thr145Ile | X |   | —    | <i>In silico</i>                 | Domain 2, $\beta$ sheet, partially buried, active site | Altered interaction with reaction intermediate and DPM              | [8]   |
| p.Ser147Pro | X |   | 0.2% | <i>In silico</i>                 | Domain 2, loop, active site                            | —                                                                   | [62]  |
| p.Arg149Leu | X |   | 0.1% | <i>In silico</i>                 | Domain 2, $\alpha$ helix, active site                  | No cofactor assembly                                                | [62]  |
| p.Arg149Gln | X |   | 0.5% | <i>In silico</i>                 | Domain 2, $\alpha$ helix, active site                  | No cofactor assembly                                                | [62]  |
| p.Arg149Leu | X |   | —    | <i>In silico</i>                 | Domain 2, $\alpha$ helix, active site                  | Altered interaction with DPM                                        | [143] |
| p.Arg149Leu | X |   | 5%   | WB                               | Domain 2, $\alpha$ helix, active site                  | —                                                                   | [13]  |
| p.Arg149Gln | X |   | 5%   | WB                               | Domain 2, $\alpha$ helix, active site                  | —                                                                   | [13]  |
| p.Leu154Pro |   | X | 0.1% | TS / WB / <i>In silico</i>       | Domain 2, $\alpha$ helix, buried                       | —                                                                   | [139] |
| p.Arg167Gln |   | X | 0.7% | TS / <i>In silico</i>            | Domain 2, loop, surface                                | —                                                                   | [142] |
| p.Arg167Gln | X |   | 1%   | TS                               | Domain 2, loop, surface                                | —                                                                   | [12]  |
| p.Arg167Gln | X |   | 1%   | <i>In silico</i>                 | Domain 2, loop, surface                                | No structural changes<br>Product release blocked                    | [62]  |
| p.Arg167Gln |   | X | —    | <i>In silico</i>                 | Domain 2, loop, surface                                | Alteration of conserved amino acid residue                          | [145] |
| p.Arg167Trp | X |   | —    | <i>In silico</i>                 | Domain 2, loop, surface                                | Altered interaction with DPM                                        | [144] |
| p.Arg167Trp | X |   | 4.2% | TS / <i>In silico</i> / SDS-PAGE | Domain 2, loop, surface                                | Altered elongation mechanism                                        | [37]  |
| p.Arg167Trp | X |   | —    | <i>In silico</i>                 | Domain 2, loop, surface                                | Altered interaction with reaction intermediate and DPM              | [8]   |

|             |   |   |                    |                                  |                                                                        |                                                                                                      |       |
|-------------|---|---|--------------------|----------------------------------|------------------------------------------------------------------------|------------------------------------------------------------------------------------------------------|-------|
| p.Arg167Trp | X |   | 3%                 | TS                               | Domain 2, loop, surface                                                | —                                                                                                    | [12]  |
| p.Arg167Trp | X |   | 2.3%               | <i>In silico</i>                 | Domain 2, loop, surface                                                | No structural changes. Product release blocked                                                       | [62]  |
| p.Gly168Trp | X |   | —                  | <i>In silico</i>                 | Domain 2, loop, surface                                                | Altered interaction with reaction intermediate and DPM but away from the active site on 3D structure | [8]   |
| p.Leu170Pro | X |   | <0.1%              | TS / WB /<br><i>In silico</i>    | Domain 2, $\alpha$ helix, surface,<br>at the edge of active site       | —                                                                                                    | [139] |
| p.Arg173Gln | X |   | 0.6%               | TS / <i>In silico</i>            | Domain 2, $\alpha$ helix, active site                                  | —                                                                                                    | [142] |
| p.Arg173Gln | X |   | —                  | <i>In silico</i>                 | Domain 2, $\alpha$ helix, active site                                  | Altered interaction with DPM                                                                         | [144] |
| p.Arg173Gln |   |   | 0.15%              | TS / <i>In silico</i> / SDS-PAGE | Domain 2, $\alpha$ helix, active site                                  | Altered interaction with DPM                                                                         | [135] |
| p.Arg173Gln | X |   | 0.4%               | <i>In silico</i>                 | Domain 2, $\alpha$ helix, active site                                  | No cofactor assembly                                                                                 | [62]  |
| p.Arg173Trp | X |   | —                  | <i>In silico</i>                 | Domain 2, $\alpha$ helix, active site                                  | Altered interaction with DPM                                                                         | [149] |
| p.Arg173Trp |   | X | 0.6%               | TS / <i>In silico</i> / SDS-PAGE | Domain 2, $\alpha$ helix, active site                                  | Altered interaction with reaction intermediate and altered elongation                                | [37]  |
| p.Arg173Trp | X |   | 0.7%               | <i>In silico</i>                 | Domain 2, $\alpha$ helix, active site                                  | —                                                                                                    | [62]  |
| p.Arg173Trp |   | X | —                  | <i>In silico</i>                 | Domain 2, $\alpha$ helix, active site                                  | Altered interaction with reaction intermediate and DPM                                               | [8]   |
| p.Leu177Arg | X |   | —                  | <i>In silico</i>                 | Domain 2, $\alpha$ helix, buried                                       | Alteration of conserved amino acid residue                                                           | [145] |
| p.Asp178Asn |   | X | 81%<br>(TS 70%)    | TS / <i>In silico</i>            | Domain 2, $\alpha$ helix, surface                                      | —                                                                                                    | [136] |
| p.Arg195Cys | X |   | 3%                 | TS                               | Domain 2, $\alpha$ helix, active site                                  | —                                                                                                    | [12]  |
| p.Arg195Cys | X |   | 3%                 | <i>In silico</i>                 | Domain 2, $\alpha$ helix, active site                                  | No cofactor assembly                                                                                 | [62]  |
| p.Arg195Cys | X |   | 0%                 | WB                               | Domain 2, $\alpha$ helix, active site                                  |                                                                                                      | [13]  |
| p.Arg201Trp |   | X | 41.6% Thermolabile | TS / <i>In silico</i>            | Domain 2, $\alpha$ helix, surface                                      | —                                                                                                    | [134] |
| p.Gln204Lys |   | X | 46% Thermolabile   | TS / <i>In silico</i> / SDS-PAGE | Domain 2, $\beta$ sheet, surface                                       | —                                                                                                    | [135] |
| p.Met212Val | X |   | 1.7%               | <i>In silico</i>                 | Domain 2, loop, surface                                                | Loss of mobility and block of substrate entrance                                                     | [149] |
| p.Val215Glu |   | X | 30%                | TS / <i>In silico</i> / SDS-PAGE | Loop between domain 1 and 2, buried,<br>close to cofactor binding loop | Altered elongation mechanism                                                                         | [37]  |
| p.Val215Met | X |   | 19%                | TS / <i>In silico</i>            | Loop between domain 1 and 2, buried,<br>close to cofactor binding loop |                                                                                                      | [136] |
| p.Gln217His | X |   | —                  | <i>In silico</i>                 | Loop between domain 1 and 2,<br>active site                            | Altered interaction with reaction intermediate and DPM                                               | [8]   |

|             |   |   |                           |                                  |                                          |                                                                                                      |       |
|-------------|---|---|---------------------------|----------------------------------|------------------------------------------|------------------------------------------------------------------------------------------------------|-------|
| p.Gln217Arg | X |   | —                         | <i>In silico</i>                 | Loop between domain 1 and 2, active site | Alteration of active-site residues Lys98 and Arg150 orientation                                      | [62]  |
| p.Gln217His | X |   | —                         | <i>In silico</i>                 | Loop between domain 1 and 2, active site | Alteration of active-site residues Lys98 and Arg150 orientation                                      | [62]  |
| p.Gln217His | X |   | 5%                        | WB                               | Loop between domain 1 and 2, active site |                                                                                                      | [13]  |
| p.Gly218Arg | X |   | —                         | <i>In silico</i>                 | Loop between domain 1 and 2, buried      | Altered interaction with reaction intermediate and DPM                                               | [8]   |
| p.Gly218Arg | X |   | 0.1%                      | <i>In silico</i>                 | Loop between domain 1 and 2, buried      |                                                                                                      | [62]  |
| p.Ala219Pro | X |   | —                         | <i>In silico</i>                 | Loop between domain 1 and 2, buried      | Altered interaction with reaction intermediate and DPM                                               | [8]   |
| p.Gly221Asp | X |   | —                         | <i>In silico</i>                 | Domain 1, loop, buried                   | Altered interaction with reaction intermediate and DPM but away from the active site on 3D structure | [8]   |
| p.Val222Met | X |   | —                         | <i>In silico</i>                 | Domain 1, $\beta$ sheet, buried          | Disruption of interaction in the active site                                                         | [147] |
| p.Val224Glu |   | X | 0.9%                      | TS / WB / <i>In silico</i>       | Domain 1, $\beta$ sheet, buried          |                                                                                                      | [139] |
| p.Arg225Gln |   |   | 102%<br>(TS 31 $\pm$ 10%) | TS                               | Domain 1, $\beta$ sheet, surface         | No defect in enzyme kinetic or stability;<br>Predicted pathogenicity: Benign                         | [12]  |
| p.Asp230Tyr |   |   | 88%<br>(TS 50 $\pm$ 16)   | TS                               | Domain 1, $\alpha$ helix, surface        | No defect in enzyme kinetic or stability;<br>Predicted pathogenicity: Benign                         | [12]  |
| p.Val235Glu | X |   | 3%                        | WB                               | Domain 1, $\alpha$ helix, buried         |                                                                                                      | [13]  |
| p.Leu238Pro |   |   | —                         | <i>In silico</i>                 | Domain 1, $\alpha$ helix, surface        | Far from active site and no interaction with reaction intermediate and DPM                           | [8]   |
| p.Asp240Gly |   | X | 5%                        | TS / WB / <i>In silico</i>       | Loop between domain1 and 3, surface      | —                                                                                                    | [139] |
| p.Cys247Arg | X |   | 2%                        | WB                               | Domain 3, $\alpha$ helix, buried         | —                                                                                                    | [13]  |
| p.Cys247Phe |   |   | 11 %                      | TS / <i>In silico</i>            | Domain 3, $\alpha$ helix, buried         | —                                                                                                    | [134] |
| p.Glu250Asp |   | X | 0.5%                      | TS / <i>In silico</i> / SDS-PAGE | Domain 3, $\alpha$ helix, buried         | —                                                                                                    | [135] |
| p.Glu250Lys |   | X | —                         | <i>In silico</i>                 | Domain 3, $\alpha$ helix, buried         | —                                                                                                    | [149] |
| p.Glu250Val | X |   | 4%                        | WB                               | Domain 3, $\alpha$ helix, buried         | —                                                                                                    | [13]  |
| p.Glu250Gln | X |   | 2%                        | WB                               | Domain 3, $\alpha$ helix, buried         | —                                                                                                    | [13]  |
| p.Glu250Ala | X |   | 4%                        | WB                               | Domain 3, $\alpha$ helix, buried         | —                                                                                                    | [13]  |
| p.Ala252Val |   | X | 61%<br>Thermolabile       | TS                               | Domain 3, $\alpha$ helix, buried         | —                                                                                                    | [12]  |
| p.His256Asn | X |   | —                         | <i>In silico</i>                 | Domain 3, loop, surface                  | Alteration of conserved amino acid residue                                                           | [143] |

|             |   |                           |                               |                                   |                                                                              |       |
|-------------|---|---------------------------|-------------------------------|-----------------------------------|------------------------------------------------------------------------------|-------|
| p.His256Tyr | X | 5%                        | WB                            | Domain 3, loop, surface           | —                                                                            | [13]  |
| p.Gly260Asp | X | —                         | <i>In silico</i>              | Domain 3, cofactor binding loop   | Impairment of chain elongation                                               | [62]  |
| p.Val267Met | X | 4%                        | WB                            | Domain 3, $\beta$ sheet, buried   | —                                                                            | [12]  |
| p.Leu278Pro | X | —                         | <i>In silico</i>              | Domain 3, loop, buried            | Folding defect                                                               | [147] |
| p.Arg321His |   | 122%<br>(TS 31 $\pm$ 10%) | TS                            | Domain 3, loop, buried            | No defect in enzyme kinetic or stability;<br>Predicted pathogenicity: Benign | [12]  |
| p.Arg321His |   | 96%                       | WB                            |                                   | —                                                                            | [13]  |
| p.Ala330Pro | X | —                         | <i>In silico</i>              | Domain 3, $\alpha$ helix, surface | Alteration in secondary structure of the protein                             | [8]   |
| p.Ala331Val | X | 62%<br>Thermolabile       | TS                            | Domain 3, $\alpha$ helix, buried  | —                                                                            | [12]  |
| p.Gly335Ser | X | 2.5%                      | <i>In silico</i>              | Domain 3, $\alpha$ helix, buried  | —                                                                            | [140] |
| p.Ala347Pro | X | 51%<br>Thermolabile       | TS / WB /<br><i>In silico</i> | Domain 3, $\alpha$ helix, buried  | —                                                                            | [139] |
| p.Asp359Asn |   | 86%<br>(TS 42 $\pm$ 13%)  | TS                            | Domain 3, loop, surface           | No defect in enzyme kinetic or stability;<br>Predicted pathogenicity: Benign | [12]  |
| p.Asp359Asn |   | 93%                       | WB                            | Domain 3, loop, surface           | —                                                                            | [13]  |

<sup>1</sup>Localisation is based on human HMBS crystal structure 7AAJ [76]

<sup>2</sup>WT, wild-type

<sup>3</sup>TS, Thermostability assays

<sup>4</sup>WB, Western blot

<sup>5</sup>*In silico*, mapping of the mutation on the human HMBS crystal structure and bioinformatical prediction
